# Supplementary material for: The Impact of the SARS-Cov2 Pandemic on a Persuasive Educational Antimicrobial Stewardship Program in a University Hospital in Southern Italy: A Pre-Post Study
Source: MDPI journal article supplement (doi:10.3390/antibiotics10111405), 2021-11-16
Supplement: s1 [file s1]

**Table S1.** Effect of the ASP interruption during COVID-19 pandemic on antibiotic consumption in the 6 units where the program had been active for more than 30 months.

| Antibiotics                             | Parameter Evaluated | Effect Estimate | LCI     | UCI   | <i>p</i> Value |
|-----------------------------------------|---------------------|-----------------|---------|-------|----------------|
| <b>Carbapenems</b>                      | Change in trend     | -0.40           | -1.23   | 0.42  | 0.31           |
|                                         | Change in level     | 2.48            | -1.83   | 6.78  | 0.21           |
| <b>Piperacillin/tazobactam</b>          | Change in trend     | 1.16            | -0.22   | 2.54  | 0.09           |
|                                         | Change in level     | 3.62            | -3.38   | 10.62 | 0.29           |
| <b>III/IV Generation Cephalosporins</b> | Change in trend     | -2.13           | -3.31   | -0.94 | <b>0.002</b>   |
|                                         | Change in level     | -3.49           | -9.57   | 2.60  | 0.24           |
| <b>Aminopenicillins/BLI</b>             | Change in trend     | -0.48           | -1.49   | 0.53  | 0.32           |
|                                         | Change in level     | 4.25            | -1.06   | 9.57  | 0.11           |
| <b>Fluoroquinolones</b>                 | Change in trend     | -0.09           | -0.56   | 0.37  | 0.67           |
|                                         | Change in level     | 0.58            | -1.73   | 2.88  | 0.60           |
| <b>Tigecyclin</b>                       | Change in trend     | 0.04            | -0.22   | 0.29  | 0.75           |
|                                         | Change in level     | 0.39            | -0.91   | 1.70  | 0.53           |
| <b>Vancomycin</b>                       | Change in trend     | -0.52           | -1.08   | 0.04  | 0.07           |
|                                         | Change in level     | -0.74           | -3.61   | 2.13  | 0.59           |
| <b>Linezolid</b>                        | Change in trend     | 0.046           | -0.45   | 0.54  | 0.84           |
|                                         | Change in level     | 1.74            | -0.80   | 4.28  | 0.16           |
| <b>Daptomycin</b>                       | Change in trend     | -0.58           | -1.18   | 0.02  | 0.57           |
|                                         | Change in level     | 2.91            | -0.48   | 6.30  | 0.09           |
| <b>Macrolides</b>                       | Change in trend     | 0.002           | -0.58   | 0.59  | 0.99           |
|                                         | Change in level     | -0.17           | -3.04   | 2.69  | 0.90           |
| <b>Echinocandins</b>                    | Change in trend     | -0.28           | -0.77   | 0.21  | 0.24           |
|                                         | Change in level     | 0.38            | -2.97   | 2.21  | 0.76           |
| <b>All antibiotics</b>                  | Change in trend     | -6.01           | -13.34  | 1.33  | 0.10           |
|                                         | Change in level     | 7.36            | -29.7   | 44.4  | 0.68           |
| <b>Costs</b>                            | Change in trend     | -46.95          | -313.6  | 219.7 | 0.71           |
|                                         | Change in level     | -402.2          | -1480.4 | 975.9 | 0.54           |

**Table S2.** Effect of the ASP interruption during COVID-19 pandemic on the length of hospital stay and mortality in medical, surgical and critical areas.

|                             | Parameter Evaluated | Effect Estimate | LCI   | UCI   | <i>p</i> Value |
|-----------------------------|---------------------|-----------------|-------|-------|----------------|
| <b>LOS (medical wards)</b>  | Change in trend     | -0.74           | -1.23 | -0.24 | 0.006          |
|                             | Change in level     | 1.23            | -1.39 | 3.87  | 0.33           |
| <b>LOS (surgical wards)</b> | Change in trend     | -0.03           | -0.12 | 0.14  | 0.71           |
|                             | Change in level     | -0.36           | -1.3  | 0.57  | 0.42           |
| <b>LOS (ICUs)</b>           | Change in trend     | -2.27           | -4.83 | 0.29  | 0.078          |
|                             | Change in level     | 5.9             | -7.5  | 19.3  | 0.36           |
| <b>Mortality (ICUs)</b>     | Change in trend     | 0.75            | -0.1  | 1.61  | 0.08           |
|                             | Change in level     | -1.54           | -5.75 | 2.66  | 0.44           |
